# 1 Temporal attention recruits 2 fronto-cingulate cortex to amplify 3 stimulus representations

4 Jiating Zhu<sup>1\*</sup>, Karen J. Tian<sup>1,2</sup>, Marisa Carrasco<sup>2</sup>, Rachel N. Denison<sup>1,2</sup>

\*For correspondence:  
[jtszhu@bu.edu](mailto:jtszhu@bu.edu)

5 <sup>1</sup>Department of Psychological and Brain Sciences, Boston University; <sup>2</sup>Department of  
6 Psychology and Center for Neural Science, New York University

---

8 **Abstract** The human brain receives a continuous stream of input, but it faces significant  
9 constraints in its ability to process every item in a sequence of stimuli. Voluntary temporal  
10 attention can alleviate these constraints by using information about upcoming stimulus timing to  
11 selectively prioritize a task-relevant item over others in a sequence. But the neural mechanisms  
12 underlying this ability remain unclear. Here, we manipulated temporal attention to successive  
13 stimuli in a two-target temporal cueing task, while controlling for temporal expectation by using  
14 fully predictable stimulus timing. We recorded magnetoencephalography (MEG) in human  
15 observers and measured the effects of temporal attention on orientation representations of each  
16 stimulus using time-resolved multivariate decoding in both sensor and source space. Voluntary  
17 temporal attention enhanced the orientation representation of the first target 235-300  
18 milliseconds after target onset. Unlike previous studies that did not isolate temporal attention  
19 from temporal expectation, we found no evidence that temporal attention enhanced early visual  
20 evoked responses. Instead, and unexpectedly, the primary source of enhanced decoding for  
21 attended stimuli in the critical time window was a contiguous region spanning left frontal cortex  
22 and cingulate cortex. The results suggest that voluntary temporal attention recruits cortical  
23 regions beyond the ventral stream at an intermediate processing stage to amplify the  
24 representation of a target stimulus, which may serve to protect it from subsequent interference  
25 by a temporal competitor.

---

27 **Keywords:** temporal attention, temporal competition, visual attention, visual perception,  
28 decoding, MEG.

## 29 Introduction

30 We live in a dynamic environment where visual input constantly changes and updates. To guide  
31 our reactions and decisions, we must prioritize behaviorally relevant information at the most useful  
32 times. The goal-directed prioritization of a task-relevant time point is voluntary temporal attention  
33 (*Nobre and Van Ede, 2018; Denison et al., 2021*). For example, when returning a table tennis serve,  
34 we voluntarily attend to the ball at the moment it bounces on the table, because it is critical to see  
35 the ball at this time to successfully return the serve (*Land and Furneaux, 1997*). Attending earlier  
36 or later is much less useful for predicting the trajectory of the ball.

37 The prioritization of relevant time points over other times reflects the selectivity of temporal  
38 attention. Selectivity is a hallmark of attention, and it is crucial for overcoming limitations in  
39 processing continuous visual information across space and time (*Carrasco, 2011; Nobre and*  
40 *Van Ede, 2023; Denison, Forthcoming; Denison et al., 2017; Anton-Erxleben and Carrasco, 2013*).

41 In the temporal domain, such limitations are often studied by using a rapid sequence of stimuli,  
42 in which observers are asked to prioritize one or more events. Various behavioral findings  
43 indicate that the brain cannot fully process each stimulus in a rapid sequence (*Lawrence, 1971*;  
44 *Raymond et al., 1992*). In the attentional blink, detection accuracy for the second of two target  
45 stimuli suffers when the stimuli are separated by 200-500 ms (*Raymond et al., 1992*; *Dux and*  
46 *Marois, 2009*). In temporal crowding, the identification of a target stimulus is impaired when it is  
47 surrounded by other stimuli in time, across similar intervals of 150-450 ms (*Yeshurun et al., 2015*;  
48 *Tkacz-Domb and Yeshurun, 2021*). At this timescale, voluntary temporal attention can flexibly  
49 prioritize stimuli at relevant time points, improving perceptual sensitivity and reaction time for  
50 temporally attended stimuli at the expense of stimuli earlier and later in time, effectively reducing  
51 temporal constraints when processing successive stimuli by selecting one stimulus over others  
52 (*Denison et al., 2017, 2021*; *Fernández et al., 2019*).

53 Despite the behavioral evidence for selectivity in temporal attention, little is known about the  
54 neural mechanisms underlying the ability to selectively attend to one point in time over another.  
55 Neural evidence of temporal attention has generally been studied by manipulating the timing  
56 predictability of a single target stimulus (*Coull and Nobre, 1998*; *Correa et al., 2006*; *Anderson and*  
57 *Sheinberg, 2008*; *Van Ede et al., 2018*; *Nobre and Van Ede, 2018, 2023*). Predictability increases  
58 the firing rates of inferotemporal neurons in non-human primates (*Anderson and Sheinberg,*  
59 *2008*) and the amplitude of visual evoked potentials in human EEG around 100-150 ms after  
60 stimulus onset (*Doherty et al., 2005*). However, studies with a single target stimulus cannot  
61 disentangle the process of attending to a task relevant time point from processes associated with  
62 the temporal predictability of the target onset, or temporal expectation. Consequently, the neural  
63 mechanisms underlying the selectivity of temporal attention are unknown. To study how  
64 temporal attention mediates selection, we therefore designed a minimal stimulus sequence with  
65 two temporally predictable stimuli on each trial. Only the time point to be attended, indicated at  
66 the beginning of each trial by a precue, varied across trials. Therefore, with timing predictability  
67 controlled, any differences in the neural representations of a stimulus when it was temporally  
68 attended vs. unattended could be attributed to temporal attentional selection.

69 Here we used MEG to investigate when and where in the brain selective temporal attention  
70 affects representations of visual stimuli. Our behavioral results confirmed that temporal  
71 attention improved perceptual sensitivity and speeded reaction time. Using time-resolved  
72 decoding, we found that voluntary temporal attention enhanced the orientation representation  
73 of the first target 235-300 ms after target onset, an intermediate time window following the  
74 earliest visual evoked responses. This time interval matches that of temporal processing  
75 constraints revealed behaviorally by tradeoffs due to voluntary temporal attention, the  
76 attentional blink, and temporal crowding. In source space reconstructions, we found that  
77 although orientation decoding was strongest in occipital areas, as expected, the strongest effects  
78 of temporal attention on orientation representations appeared in left fronto-cingulate regions.  
79 Additionally, we found no impact of temporal attention on univariate visual responses, unlike  
80 previous studies that manipulated temporal attention via temporal expectation. Altogether the  
81 results suggest that voluntary temporal attention selectively prioritizes a target stimulus over its  
82 temporal competitors by amplifying its representation in fronto-cingulate regions at an  
83 intermediate processing stage around 250 ms. This result suggests that temporal attention  
84 achieves stimulus selection using neural mechanisms not previously observed for spatial or  
85 feature-based attention, perhaps due to the distinctive demands of sequential processing.

## 86 Results

### 87 Temporal precueing improved perceptual sensitivity

88 To investigate the effects of voluntary temporal attention, we recorded MEG while observers  
89 performed a two-target temporal cueing task (Figure 1A). At the start of each trial, a precue tone

90 instructed observers to attend to either the first target (T1) or the second target (T2). The two  
 91 sequential grating targets were separated by a 300 ms stimulus onset asynchrony (SOA). At the  
 92 end of each trial, a response cue tone instructed observers to report the tilt (clockwise or  
 93 counterclockwise) of one of the targets. The precue and response cue were matched on 75% of  
 94 the trials (valid trials) and mismatched on 25% of the trials (invalid trials), so observers had an  
 95 incentive to direct their attention to the precued target.

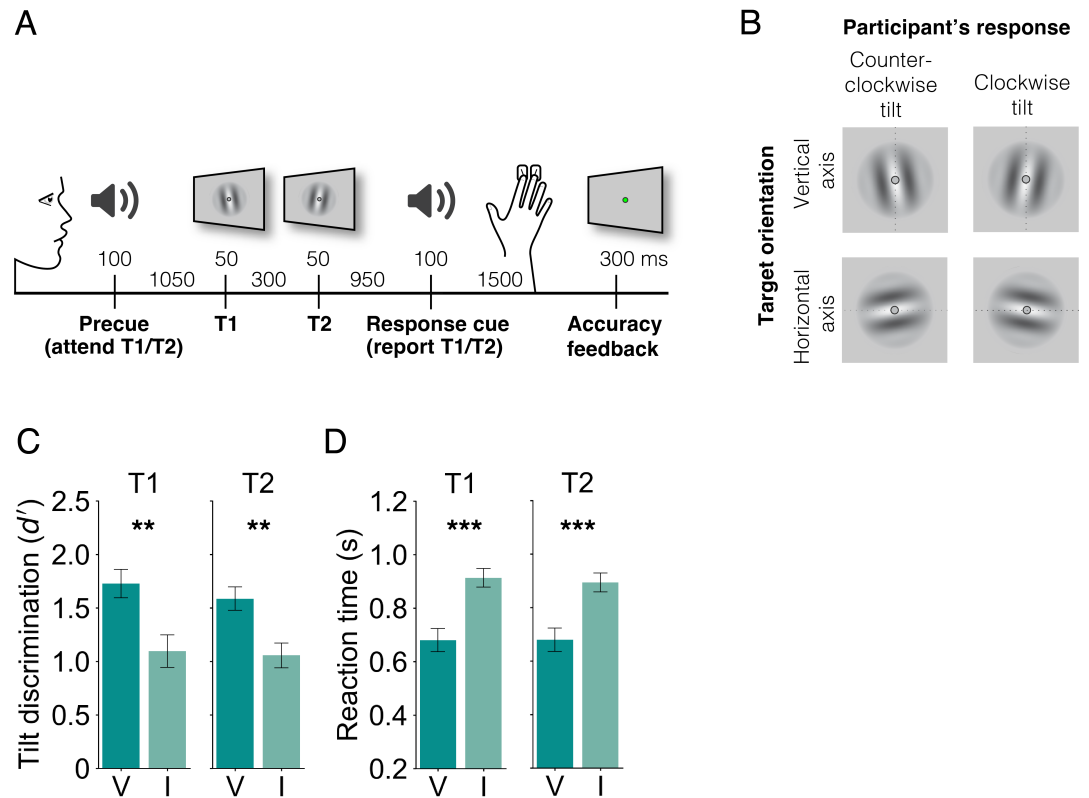

**Figure 1.** Two-target temporal cueing task and behavioral results. **(A)** Trial timeline showing stimulus durations and SOAs. Precues and response cues were pure tones (high = cue T1, low = cue T2). **(B)** Targets were independently tilted about the vertical or horizontal axes. Participants were instructed to report the clockwise or counterclockwise tilt of the target indicated by the response cue, and axis orientation was the decoded stimulus property. **(C)** Tilt discrimination (sensitivity) and **(D)** reaction time for each target (T1, T2) by validity condition. Sensitivity was higher and reaction time was faster for valid (V) than invalid (I) trials. Error bars indicate  $\pm 1$  SEM. \*\*  $p < 0.01$ ; \*\*\*  $p < 0.001$ .

96 Importantly, targets were tilted independently about either the vertical or the horizontal axis,  
 97 allowing us to use MEG to decode a sensory feature — axis orientation — that was orthogonal to  
 98 the participant's report. Targets were oriented near vertical or horizontal, with individually titrated  
 99 tilt thresholds ranging from 0.4-1.5 degrees (mean 0.76 degrees), and the participant's report was  
 100 clockwise or counterclockwise tilt with respect to the main axis (Figure 1B).

101 Temporal attention improved tilt discrimination performance, consistent with previous findings  
 102 (Denison *et al.*, 2017, 2021; Fernández *et al.*, 2019; Rohenkohl *et al.*, 2014; Samaha *et al.*, 2015).  
 103 Perceptual sensitivity ( $d'$ ) was higher for valid trials than invalid trials (Figure 1C; main effect of  
 104 validity:  $F(1, 9) = 20.22$ ,  $p = 0.0015$ ,  $\eta_G^2 = 0.25$ ). Perceptual sensitivity was similar for targets T1 and  
 105 T2. The improvement in  $d'$  with temporal attention was significant for both target T1 ( $F(1, 9) = 26.98$ ,  
 106  $p < 0.001$ ,  $\eta_G^2 = 0.25$ ) and target T2 ( $F(1, 9) = 10.19$ ,  $p = 0.011$ ,  $\eta_G^2 = 0.26$ ). There was no main effect of  
 107 target or interaction between validity and target ( $F(1, 9) < 0.59$ ,  $p > 0.47$ ).

108 Reaction time (RT) was faster for valid than invalid trials (Figure 1D; main effect of validity:

109  $F(1, 9) = 70.60, p < 0.001, \eta_G^2 = 0.32$ ) with improvements for both target T1 ( $F(1, 9) = 61.13, p < 0.001,$   
110  $\eta_G^2 = 0.35$ ) and target T2 ( $F(1, 9) = 57.5, p < 0.001, \eta_G^2 = 0.30$ ). There was no main effect of target or  
111 interaction between validity and target ( $F(1, 9) < 0.67, p > 0.43$ ). Therefore the improvement in  
112 perceptual sensitivity with the precue was not due to a speed-accuracy tradeoff.

### 113 **No effect of temporal attention on visual evoked response peaks**

114 We first investigated whether temporal attention affected univariate visual evoked responses  
115 recorded from MEG. To do so, we identified visually responsive channels for each participant and  
116 session by ranking all 157 channels by the magnitudes of their visually evoked responses  
117 following stimulus onset, regardless of the precue (see Methods). The average for the 5 most  
118 visually responsive channels, which were in posterior locations, shows clear visual evoked  
119 responses after each target (Figure 2A), with no apparent effect of temporal attention. We  
120 characterized the evoked response peaks quantitatively and found no differences between  
121 precue conditions in the peak amplitudes of the evoked responses for any selected number of  
122 channels (Figure 2B; T1:  $F(1, 9) < 1.31, p > 0.28$ ; T2:  $F(1, 9) < 5.2$  and  $p > 0.043$  uncorrected; none  
123 survived corrections for multiple comparisons across channel groupings). Likewise, we observed  
124 no differences in evoked response peak latencies (Figure 2C; T1:  $F(1, 9) < 1.67, p > 0.23$ ; T2:  
125  $F(1, 9) < 2.65, p > 0.14$ ). Thus we found no evidence that voluntary temporal attention affected  
126 visual evoked responses, when assessed in a univariate fashion.

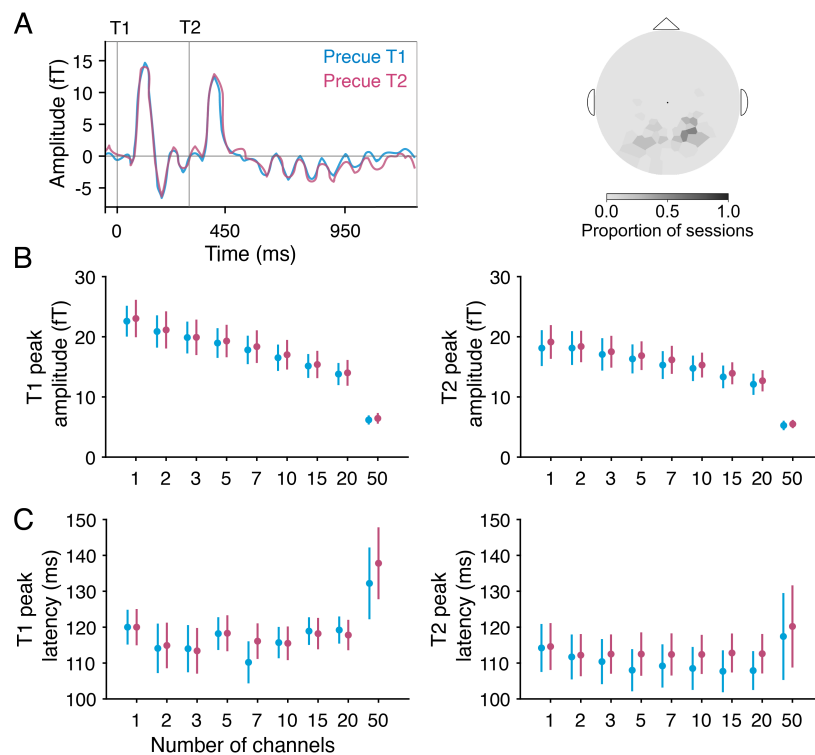

**Figure 2.** MEG evoked responses. **(A)** Average evoked time series by precue from the 5 most visually responsive channels. Channels were rank ordered by evoked peak prominence. Target onsets are marked with gray vertical lines. Varying the number of selected channels yielded no differences in target-evoked **(B)** peak amplitude or **(C)** peak latency by precue for either target in any channel grouping.

127 **Temporal attention increased orientation decoding performance following the**  
128 **initial visual evoked response**

129 To investigate whether temporal attention improved the representation of orientation information,  
130 we next examined multivariate patterns from the MEG channels, using decoding accuracy as an  
131 index of the quality of orientation representations. For each participant and session, we selected  
132 the 50 most visually responsive channels for decoding analysis (see Methods). As expected, the  
133 selected channels tended to be in posterior locations (Figure 3 inset at top right).

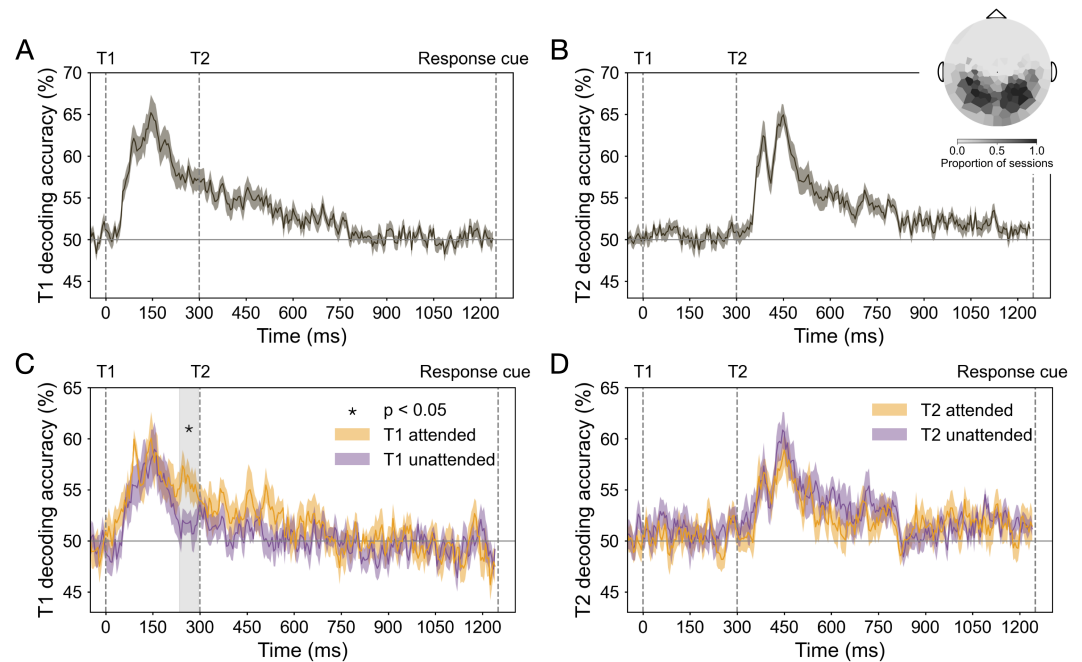

**Figure 3.** Decoding performance in MEG sensor space. Event onsets are marked with vertical dashed lines. **(A)** T1 orientation decoding performance for all trials. **(B)** T2 orientation decoding performance for all trials. Inset in (B) shows the topography of channels used for decoding across all sessions (the 50 most visually responsive channels per session). **(C)** T1 orientation decoding performance for target attended (precue T1) and unattended (precue T2) trials. Enhancement of orientation representation occurred 235-300 ms after target onset; gray shaded region shows cluster-corrected significant window (“critical time window”). **(D)** T2 orientation decoding performance for target attended (precue T2) and unattended (precue T1) trials.

134 We trained separate orientation classifiers for T1 and T2, which on each trial had independent  
135 vertical or horizontal axis orientations. For both targets, decoding performance reached about  
136 65% accuracy, peaking around 150 ms after target onset (Figure 3A and B). There was no significant  
137 difference between the peak decoding performance of the two targets (decoding accuracy at 150  
138  $\pm 25$  ms,  $t = 1.81$ ,  $p > 0.10$ ). Therefore, stimulus orientation was decodable for both targets, with  
139 comparable performance for T1 and T2, allowing us to investigate the time-resolved orientation  
140 representation of each target separately.

141 To investigate the effect of temporal attention on the orientation representation of each target,  
142 we next trained and tested time-resolved classifiers on target attended trials and unattended trials  
143 separately. T1 decoding accuracy was higher on attended than unattended trials in a time window  
144 235-300 ms after target onset ( $p < 0.05$  cluster-corrected; Figure 3C). This significant window started  
145 about 100 ms after orientation decoding performance peaked and ended just before T2 appeared.  
146 There was no similar enhancement when decoding the T2 orientation (Figure 3D). This difference  
147 between the targets may be due to the temporal asymmetry of T1 and T2, as T2 follows T1 but no  
148 target stimulus follows T2.

149 We confirmed the enhancement of temporal attention on orientation decoding for T1 around

150 250 ms in a separate dataset, in which the targets were superimposed on a 20-Hz flickering noise  
151 patch instead of a blank background (see Supplementary Figure 1A and Supplementary Text).

### 152 **Widespread decodability of orientation representations across cortex**

153 We next asked how orientation representations and the effect of temporal attention varied  
154 across the cortex. We focused our spatial analysis on T1, because we found no effect of temporal  
155 attention on T2 decoding at the channel level. Using source reconstruction, we estimated the  
156 MEG response at each time point at vertex locations across the cortical surface (Dale et al., 2000;  
157 Gramfort et al., 2013). We then applied time-resolved decoding analysis to vertices in each of 34  
158 bilateral Desikan-Killiany (DK) atlas regions of interest (ROIs) (Desikan et al., 2006). In the critical  
159 time window, orientation decoding performance across all trials was highest in posterior regions,  
160 as expected (Figure 4A). We obtained decoding performance for the occipital, parietal, temporal,  
161 and frontal lobes by averaging decoding performance across the ROIs within each lobe (Klein and  
162 Tourville, 2012).

163 The T1 decoding performance for each of the 4 lobes at each time point showed a systematic  
164 pattern of decoding accuracy: highest in occipital, lower in parietal and temporal, and lowest in the  
165 frontal lobe (Figure 4B). In addition, decoding performance peaked later in the frontal lobe than in  
166 the other three lobes, around 250 ms. Such progression of decoding strength and timing across  
167 lobes is consistent with the visual processing hierarchy, demonstrating the feasibility of decoding  
168 orientation in source space.

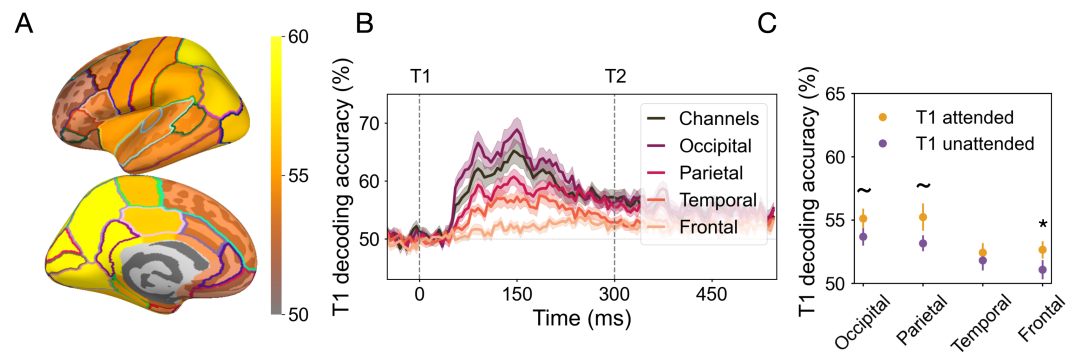

**Figure 4.** Decoding performance in MEG source space. **(A)** T1 decoding performance for 34 bilateral Desikan-Killiany atlas regions averaged across time points within the critical time window. The regions with the highest decoding performance were posterior regions in light yellow. **(B)** T1 decoding performance from all trials by lobe. Consistent with T1 decoding performance from sensor space, decoding performance for the occipital, parietal, and temporal lobes peaked around 150 ms after target onset, whereas frontal decoding peaked later, around 250 ms. **(C)** Effect of temporal attention averaged across time points within the critical time window. Error bars indicate  $\pm 1$  SEM. \*  $p < 0.05$ , ~  $p < 0.1$ .

### 169 **Temporal attention enhances orientation representations in left fronto-cingulate** 170 **cortex**

171 We next asked where in the brain temporal attention increases orientation representations of T1  
172 during the critical time window (235-300 ms after target onset; Figure 3). In this time window,  
173 although the frontal lobe had lower decoding overall, it showed the biggest difference between  
174 attended and unattended trials (Figure 4C), which was statistically reliable ( $F(1, 9) = 7.29$ ,  $p = 0.024$ ,  
175  $\eta_G^2 = 0.12$ ). The occipital lobe ( $F(1, 9) = 3.40$ ,  $p = 0.098$ ,  $\eta_G^2 = 0.098$ ) and the parietal lobe ( $F(1, 9) = 3.49$ ,  
176  $p = 0.095$ ,  $\eta_G^2 = 0.13$ ) showed marginal differences between attention conditions, while the temporal  
177 lobe had no statistically significant difference ( $F(1, 9) < 0.39$ ,  $p > 0.54$ ).

178 To more precisely localize the cortical regions underlying the enhancement of orientation  
179 representations, we examined orientation decoding in the 34 DK ROIs in each hemisphere within

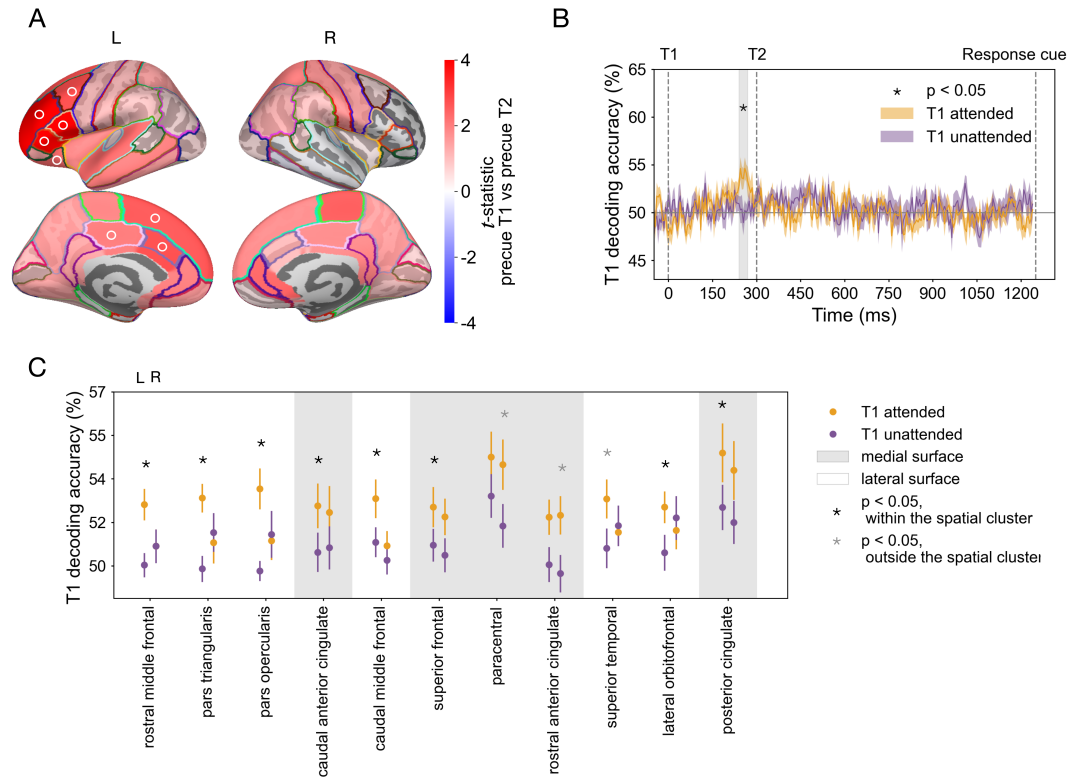

**Figure 5.** Topography of temporal attentional enhancement of orientation representations. **(A)** T1 decoding differences between attended and unattended conditions for left (L) and right (R) hemispheres, based on the average decoding performance within the critical time window for each of 68 DK ROIs. A connected left fronto-cingulate region survived spatial cluster correction ( $p < 0.05$ , ROIs in the cluster marked with ○ symbol). **(B)** Time-resolved decoding accuracy of the cluster (average across the 8 ROIs marked with ○ in (A)) recovers enhancement of orientation representation within the critical time window (240-275 ms after target onset, gray shaded region). **(C)** Left-lateralization of effect of temporal attention on T1 decoding in the critical time window. ROIs ordered by their attended vs. unattended p-values, based on the hemisphere with the strongest attention effect (all ROIs with uncorrected  $p < 0.05$  in at least one hemisphere are shown). ROIs on the lateral surface of the cortex (white background) show strong left lateralization of temporal attention. ROIs on the medial surface (gray background) show more bilateral effects of temporal attention. Error bars indicate  $\pm 1$  SEM.

180 the critical time window (235-300 ms) in which temporal attention improved T1 decoding in  
181 sensor space. One spatial cluster showed an attentional enhancement of orientation decoding  
182 that survived the cluster permutation correction across ROIs (regions in the cluster are marked  
183 by ○ in Figure 5A). This significant cluster was comprised of eight regions in the left hemisphere:  
184 seven in the frontal lobe and one in the parietal lobe. The eight regions ranked by their p-values  
185 are left rostral middle frontal, pars triangularis, pars opercularis, caudal anterior cingulate, caudal  
186 middle frontal, superior frontal, lateral orbital frontal, and posterior cingulate. If we treat the  
187 cingulate cortex as a separate lobe (*Klein and Tourville, 2012*), two of the regions in the cluster,  
188 including the parietal region, are in the cingulate lobe. Therefore we characterize the significant  
189 cluster as located in left fronto-cingulate cortex.

190 We next investigated the time-resolved decoding performance in the fronto-cingulate cluster  
191 by averaging across the eight regions at every time point. Orientation decoding performance was  
192 enhanced in target attended trials in a time window (240-270 ms) which fell within the significant  
193 time window we found in the sensor space (Figure 5B), confirming that the critical time window  
194 was recovered from the fronto-cingulate cluster alone. In addition, decoding performance in the  
195 cluster peaked around 250 ms in target attended trials, with no transient early peak as was found  
196 in the occipital lobe. This time course indicates that the orientation information decoded from  
197 the fronto-cingulate cluster did not arise from signal leakage from the occipital lobe during source  
198 reconstruction.

199 Finally, we investigated the degree of hemispheric lateralization in the regions with the  
200 strongest attention effects (Figure 5C). Regions located on the lateral surface of the hemisphere  
201 were strongly lateralized, with significant differences between attended and unattended trials for  
202 regions in the left hemisphere but not in their right hemisphere counterparts, whereas medial  
203 regions tended to have bilateral attention effects. It is important to note that source estimation  
204 may not be sufficiently precise to fully localize signals arising from the medial surface to the  
205 correct hemisphere (*Molins et al., 2008*). Altogether, the source analysis reveals that the  
206 strongest temporal attentional enhancement of orientation representations was left-lateralized  
207 in the fronto-cingulate cortex.

## 208 Discussion

209 The visual system faces significant constraints in processing the continuous visual information it  
210 receives. Humans can cognitively manage these constraints by using voluntary temporal  
211 attention to prioritize stimuli at task-relevant times at the expense of temporal competitors, but  
212 the neural mechanisms underlying this ability have received scant investigation. Here we  
213 experimentally manipulated temporal attention—while controlling temporal expectation—and  
214 used time-resolved MEG decoding (*Cichy et al., 2015; King et al., 2016*) together with source  
215 localization to uncover how voluntary temporal attention selectively enhances neural  
216 representations of oriented stimuli at task-relevant points in time within a stimulus sequence.  
217 Our results reveal neural mechanisms of temporal attentional selection, and, unexpectedly,  
218 argue for a specific role of left fronto-cingulate cortex in amplifying target information under  
219 temporal constraints.

220 We found, in two independent datasets, that temporal attention enhanced the orientation  
221 representation of the first target at an intermediate processing stage around 250 ms: later than  
222 early visual event-related responses and the peak orientation decoding accuracy (~120-150 ms  
223 after target onset) (*Cichy et al., 2015; Wardle et al., 2016; Pantazis et al., 2018*), but before  
224 decoding performance fell to chance (~500 ms). Interestingly, this window corresponds to the  
225 interval when temporal attention is maximally selective. In *Denison et al. (2021)*, maximal  
226 attentional tradeoffs in behavior appeared when the two targets were separated by an SOA of  
227 250 ms, with decreasing tradeoffs at shorter and longer SOAs.

228 Attention enhanced orientation decodability for T1 but not for T2. The finding that attentional  
229 enhancement was specific to the first target is consistent with a previous two-target temporal



230 cueing study (*Denison et al., 2022*), which adds to the evidence that modulating the first target  
231 may be sufficient to bias downstream competition for processing T1 vs. T2. Given that temporal  
232 attention affected behavior for both T1 and T2 to a similar degree, the data suggest that temporal  
233 attention modulates the processing of the two targets by different mechanisms. A difference in  
234 neural mechanisms for attending to T1 vs. T2 may arise because the two targets have different  
235 temporal contexts: T1 is followed by its competitor while T2 has no competitor following it.  
236 Previous behavioral results from a temporal attention task with three sequential targets have  
237 also suggested temporal asymmetries (*Denison et al., 2017*).

238 Although we initially expected temporal attention to predominantly modulate visual cortical  
239 representations, based on studies of temporal expectation that focused on visual areas (*Doherty*  
240 *et al., 2005; Correa et al., 2006; Lima et al., 2011; Anderson and Sheinberg, 2008; Van Ede et al.,*  
241 *2018*), we found that the most reliable modulations of sensory representations by temporal  
242 attention were not in the ventral stream. Rather, left frontal cortex and cingulate regions showed  
243 the strongest attentional modulations of orientation decoding, even though they had lower  
244 overall orientation decoding levels than occipital regions. Previous studies could not have  
245 uncovered effects of temporal attention on neural representations beyond visual areas, because  
246 they used electrode penetrations confined to sensory areas, or EEG methods which did not  
247 permit high spatial resolution source reconstruction. Taking advantage of the combined temporal  
248 and spatial resolution of MEG, the present results revealed which cortical areas were modulated  
249 by temporal attention during the precise time window when this modulation occurred.

250 The strong left lateralization we observed in frontal and cingulate areas is consistent with  
251 studies that have recorded a left hemisphere bias for temporal cueing using positron emission  
252 tomography (PET) and fMRI (*Nobre and Rohenkohl, 2014; Coull and Nobre, 1998; Coull et al.,*  
253 *2000, 2001; Davranche et al., 2011; Cotti et al., 2011*). In particular, the left inferior frontal gyrus  
254 (BA44/6) found in temporal orienting of attention (*Coull and Nobre, 1998*) overlaps with the pars  
255 opercularis region, which is one of the frontoparietal regions we found to have the strongest  
256 temporal attention effect. In these previous studies, univariate measures showed activity in these  
257 regions, but their precise function was unclear. One interpretation was that these frontoparietal  
258 regions could be part of a control network for the deployment of attention at specific time points  
259 (*Kastner and Ungerleider, 2000; Wang et al., 2010*). The current findings that these areas carry  
260 orientation-specific information, which is enhanced when temporally attended, suggest the  
261 alternative possibility that these areas are involved in maintaining attended stimulus  
262 representations. It is also possible that a left frontoparietal network is recruited for multiple  
263 aspects of temporal attention, including both control and stimulus selection.

264 The eight connected fronto-cingulate regions showing higher decoding performance for  
265 attended targets overlap substantially with regions that have been associated with the  
266 cingulo-opercular (CO) network (*Dworetzky et al., 2021*). The CO regions—the dorsal anterior  
267 cingulate cortex/medial superior frontal cortex (dACC/msFC) and anterior insula/frontal  
268 operculum (al/fO)—show activity in diverse tasks (*Dosenbach et al., 2007*). In a visual working  
269 memory task, a retrocue directing focus to an item already in memory recruited the CO network  
270 (*Wallis et al., 2015*), suggesting that CO regions were selecting the cued item and reformatting it  
271 into an action-oriented representation (*Myers et al., 2017*). The CO network has also been found  
272 to flexibly affiliate with other networks depending on task demands in cognitive tasks with  
273 different combinations of logic, sensory, and motor rules (*Cocuzza et al., 2020*). Based on these  
274 findings, we might speculate that the CO network provides extra cortical resources to maintain  
275 and possibly reformat the representation of the first target, which might otherwise get  
276 overwritten by the second target within visual cortex.

277 Previous research supports the idea that temporal anticipation can protect target processing  
278 from a subsequent distractor. One study used a warning signal on some trials to cue observers to  
279 an upcoming target that could be followed after 150 ms by a distractor. When the warning signal  
280 was present, orientation decoding for the target was enhanced ~200-250 ms after target onset

281 (*Van Ede et al., 2018*), but only when the distractor was present, suggesting that the warning  
282 signal served to reduce distractor interference. Another study, on working memory, presented  
283 distractors at a predictable time during the retention interval, 1.1 s following the final memory  
284 target. Occipital alpha power and phase locking increased just before the distractor appeared  
285 and were associated with reduced impact of the distractor on memory performance (*Bonnefond  
286 and Jensen, 2012*). These studies, which involved different task types, temporal scales between  
287 targets and distractors, and measured neural signals, suggest that the brain may have diverse  
288 mechanisms for shielding target processing from temporally anticipated distractors. Here we  
289 isolated the contribution of voluntary temporal attention to enhancing target processing in the  
290 presence of temporal distractors, while controlling other voluntary and involuntary processes  
291 related to stimulus predictability and alerting, to reveal the flexible, top-down mechanisms of  
292 temporal selection. In this case, attention enhanced target stimulus representations even before  
293 the temporal competitor appeared.

294 Isolating temporal attention from other processes also indicated that the mechanisms of  
295 temporal attention may be distinct from those of temporal expectation. Studies that manipulated  
296 temporal attention together with temporal expectation by manipulating the timing predictability  
297 of a single target stimulus found enhancements in early visual evoked responses (*Doherty et al.,  
298 2005; Correa et al., 2006; Miniussi et al., 1999; Griffin et al., 2002*), which we did not observe in  
299 response to our targeted manipulation of temporal attention. Although it is difficult to reach a  
300 strong conclusion from the absence of an effect, we did observe attention-related changes in  
301 neural activity at intermediate time windows—confirming the sensitivity of our  
302 measurements—and found no evidence for effects of temporal attention on univariate evoked  
303 responses across a range of channel selections. It is therefore possible that previous  
304 observations of early modulations of visual responses were more closely linked to timing  
305 predictability than to the prioritization of a task-relevant time point per se.

306 Temporal attention may also affect early sensory processing in some other way than increasing  
307 visual evoked responses. A recent study from our group measured occipital cortical responses to a  
308 steady-state flickering stimulus with overlaid targets (*Denison et al., 2022*). Temporal attention to  
309 the first target transiently increased the effect of the target on the steady-state response ~150 ms  
310 after target onset, demonstrating early modulations specific to temporal attention. In our current  
311 data, we also observed an early peak in decoding accuracy for T1 that was present when T1 was  
312 attended but absent when it was unattended, which was localized to occipital and parietal regions.  
313 However, this difference between attention conditions did not survive cluster correction across  
314 the whole time series (see Supplementary Figure 2 and Supplementary Text), likely due to the brief  
315 duration of the peak.

316 Indeed, here when isolating temporal attention from temporal expectation, we found the  
317 strongest effects of temporal attention in fronto-cingulate cortex. Temporal cueing studies that  
318 combined temporal attention and expectation were not able to investigate stimulus  
319 representations in these anterior brain regions. Therefore, although the present results suggest  
320 distinct mechanisms for temporal attention and temporal expectation, future studies that  
321 independently manipulate these two processes in the same experiment will be important for  
322 resolving their shared and distinct mechanisms.

## 323 **Conclusions**

324 We found that using voluntary temporal attention to select one stimulus over another within a  
325 short sequence enhanced the neural representation of the selected stimulus identity. This  
326 enhancement occurred 235-300 milliseconds after the onset of the first target, reflecting an  
327 intermediate stage of processing that matches the timing of maximal temporal attentional  
328 tradeoffs observed behaviorally (*Denison et al., 2021*). Surprisingly, the enhancement was  
329 localized not to visual cortical regions but to left-lateralized fronto-cingulate cortex. The results  
330 suggest that temporal attention improves visual task performance by maintaining target

331 information in these anterior regions, which may act as a protective reservoir for task-relevant  
332 information in the presence of a subsequent temporal competitor. In contrast, we found no  
333 effect of temporal attention—when isolated from temporal expectation—on visual evoked  
334 responses. The data thus revealed a role for cortical areas beyond the ventral stream in the  
335 temporal selection of a behaviorally relevant target and uncovered an unforeseen effect of  
336 voluntary temporal attention.

## 337 **Methods**

### 338 **Observers**

339 Ten observers (5 females, mean age = 29 years old, SD = 4 years), including authors RND and KJT,  
340 participated in the study. Each observer completed 1 behavioral training session and two 2-hour  
341 MEG sessions on separate days for 20 sessions of MEG data in total. This approach allowed us to  
342 check the reliability of the data across sessions for each observer and is similar to the approach  
343 taken by other MEG studies of vision (*Kok et al., 2017; Besserve et al., 2007*). All observers had  
344 normal or corrected-to-normal vision using MR safe lenses. All observers provided informed  
345 consent and were compensated for their time. Experimental protocols were approved by the  
346 University Committee on Activities involving Human Subjects at New York University.

### 347 **Stimuli**

348 Stimuli were generated using MATLAB and Psychtoolbox (*Brainard and Vision, 1997; Pelli and*  
349 *Vision, 1997; Kleiner et al., 2007*) on an iMac.

350 Stimuli were projected using a InFocus LP850 projector (Texas Instruments, Warren, NJ) via a  
351 mirror onto a translucent screen. The screen had a resolution of 1024 x 768 pixels and a refresh  
352 rate of 60 Hz and was placed at a viewing distance of 42 cm. Stimuli were displayed on a medium  
353 gray background with a luminance of 206 cd/m<sup>2</sup>. Target timing was checked with photodiode  
354 measurements. For behavioral training sessions outside of the MEG, stimuli were presented on a  
355 gamma-corrected Sony Trinitron G520 CRT monitor with a resolution of 1024 x 768 pixels and a  
356 refresh rate of 60 Hz placed at a viewing distance of 56 cm. Observers were seated at a  
357 chin-and-head rest to stabilize their head position and viewing distance.

358 **Visual targets.** Visual targets were full contrast sinusoidal gratings with spatial frequency of  
359 1.5 cpd presented foveally. The gratings were 4° in diameter and had an outer edge subtending  
360 0.4° that smoothly ramped down to zero contrast.

361 **Auditory cues.** Auditory precues and response cues were pure sine wave tones 100 ms in  
362 duration with 10 ms cosine amplitude ramps at the beginning and end to prevent clicks. Tones  
363 were either high-pitched (1046.5 Hz, C6) indicating T1 or low-pitched (440 Hz, A4) indicating T2.

### 364 **Task**

365 Observers were asked to direct voluntary temporal attention to different time points in a sequence  
366 of two visual targets and to discriminate the tilt of one target. On each trial, two targets (T1 and  
367 T2) appeared one after another in the same location. The targets were presented for 50 ms each  
368 and separated by a 300 ms stimulus onset asynchrony (SOA) based on psychophysical studies that  
369 have shown temporal attentional tradeoffs at this timescale (*Denison et al., 2017, 2021; Fernández*  
370 *et al., 2019*). Each target was tilted slightly clockwise (CW) or counterclockwise (CCW) from either  
371 the vertical or horizontal axis (Figure 1B). Tilts and axes were independent and counterbalanced  
372 for each target.

373 An auditory precue 1,050 ms before the targets instructed observers to attend to either T1 (high  
374 tone) or T2 (low tone). An auditory response cue 950 ms after the targets instructed observers to  
375 report the tilt (CW or CCW) of either T1 or T2. Observers pressed one of two buttons to indicate  
376 whether the tilt was CW or CCW relative to the main axis within a 1500 ms response window. At the  
377 end of the trial, observers received feedback for their tilt report via a color change in the fixation  
378 circle (green: correct; red: incorrect; blue: response timeout).

379 On every trial, the targets were fully predictable in time following the precue. The attended  
380 target varied trial-to-trial according to the precue, and the target selected for report varied trial-to-  
381 trial according to the response cue. On trials in which the precue directed attention to one target  
382 (80% of trials), the precue and response cue usually matched (75% validity), so the observers had  
383 an incentive to direct their attention to the time point indicated by the precue. The precued target  
384 and cue validity were randomly shuffled across trials, for 192 trials per precue T1 and precue T2  
385 condition in each MEG session.

386 The experiment also included neutral trials (20% of trials). On neutral trials, the auditory precue  
387 was a combination of the high and low tones, which directed attention to both targets and was thus  
388 uninformative. The neutral condition had half the number of trials as the precue T1 and precue  
389 T2 conditions and so was not included in the MEG analyses to ensure comparability across precue  
390 conditions, as decoding performance is sensitive to trial counts.

391 **Training.** Observers first completed a behavioral training session (outside of MEG) to learn the  
392 task and determine their tilt thresholds. Tilts were thresholded individually per observer (mean tilt  
393 =  $0.76^\circ$ ) using a 3-up-1-down staircasing procedure to achieve ~79% accuracy on neutral trials.

### 394 **Eye tracking**

395 Observers maintained fixation on a central circle that was  $0.15^\circ$  in diameter throughout each trial.  
396 Gaze position was measured using an EyeLink 1000 eye tracker (SR Research) with a sampling rate  
397 of 1000 Hz. A five-point-grid calibration was performed at the start of each session to transform  
398 gaze position into degrees of visual angle.

### 399 **MEG**

400 Each MEG session included 12 experimental blocks that were each approximately 6 minutes long.  
401 Observers could rest between blocks and indicated their readiness for the next block with a button  
402 press.

403 Before MEG recording, observer head shapes were digitized using a handheld FastSCAN laser  
404 scanner (Polhemus, VT, USA). Digital markers were placed on the forehead, nasion, and the left  
405 and right tragus and peri-auricular points. These marker locations were measured at the start and  
406 end of each MEG recording session. To accurately register the marker locations relative to the MEG  
407 channels, electrodes were situated on the locations identified by the digital markers corresponding  
408 to the forehead and left and right peri-auricular points.

409 MEG data was continuously recorded using a 157-channel axial gradiometer (Kanazawa  
410 Institute of Technology, Kanazawa, Japan) in the KIT/NYU facility at New York University.  
411 Environmental noise was measured by three orthogonally-positioned reference magnetometers,  
412 situated roughly 20 cm away from the recording array. The magnetic fields were sampled at 1000  
413 Hz with online DC filtering and 200 Hz high-pass filtering.

### 414 **Preprocessing**

415 MEG preprocessing was performed in Matlab using the FieldTrip toolbox for EEG/MEG-analysis  
416 (*Oostenveld et al., 2011*) in the following steps: 1) Trials were visually inspected and manually  
417 rejected for blinks and other artifacts. The number of rejected trials per session ranged from 18  
418 to 88 (3.49 – 17.05%), mean = 51.75 (10.03%), SD = 20.06. 2) Problematic channels were  
419 automatically identified based on the standard deviations of their recorded time series. 3) The  
420 time series from channels with extreme standard deviations were interpolated from those of  
421 neighboring channels. The number of interpolated channels per recorded session ranged from 0  
422 to 6 (0 – 3.82%), mean = 3.85 (2.45%), SD = 1.50. 4) The time series recorded from the reference  
423 magnetometers were regressed from the channel time series to remove environmental noise.

## 424 **Peak analysis**

425 For each session, we sorted channels by their visual responsiveness, quantified by the  
426 prominence of the evoked response peaks in the average time series across all trials. We applied  
427 the MATLAB algorithm `findpeaks.m` to a 300 ms window following target onset, for each target, to  
428 identify the most prominent peak per target. Peak prominence quantifies how much the peak  
429 stands out relative to other peaks based on its height and location, regardless of the  
430 directionality of the peak. Peak directionality in MEG depends on the orientation of the cortical  
431 surface with respect to the gradiometers, so visually responsive channels can show either  
432 upward or downward peaks. For each channel, we averaged peak prominence magnitude across  
433 the two targets, and ranked channels by this value. We confirmed the top ranked channels were  
434 in the posterior locations.

435 To assess whether temporal attention affects the evoked response amplitude and latency, we  
436 first averaged the trial time series, for each observer and precue condition, across the top  $k$   
437 channels, from  $k = 1$  to  $k = 50$ , with channels sorted by their peak prominence rankings. Channels  
438 with downward peaks were sign-flipped, so that the direction of the evoked responses was  
439 consistent across channels. To capture the early visual evoked responses in the visually  
440 responsive channels, we applied the `findpeaks.m` algorithm to a 100-250 ms window following  
441 each target and quantified the evoked response amplitude and latency per observer and precue  
442 condition for each channel grouping.

## 443 **Source reconstruction**

444 To examine the cortical sources of temporal attention effects observed at the channel level, we  
445 performed source reconstruction using MNE Python (*Gramfort et al., 2013*). For each participant,  
446 a 3D mesh of the cortex was generated from their structural MRI, with an approximate resolution  
447 of 4000 vertices per hemisphere. The MEG and MRI were coregistered automatically (*Gramfort*  
448 *et al., 2013; Houck and Claus, 2020*) based on the three anatomical fiducial points and digitized  
449 points on the scalp scanned by the laser scanner. Forward models were computed using a single-  
450 shell Boundary Element Model (BEM), which describes the head geometry and conductivities of the  
451 different tissues. The forward model was inverted using dynamic statistical parametric mapping  
452 (dSPM) (*Dale et al., 2000*) to compute source estimates for each trial and time point. The estimated  
453 source for each vertex was a dipole that was oriented perpendicular to the cortical surface. The  
454 positive or negative value of the dipole indicated whether the currents were outgoing or ingoing,  
455 respectively (*Wang et al., 2023*).

456 We divided the brain into 34 bilateral regions defined by the Desikan–Killiany (DK) atlas (*Desikan*  
457 *et al., 2006*). An approximate mapping of individual ‘Desikan-Killiany’ regions of interest (ROIs) to  
458 the occipital, parietal, temporal, and frontal lobes was applied, following (*Klein and Tourville, 2012*).

## 459 **Decoding**

460 We trained linear support vector machine (SVM) decoders to classify stimulus orientation (vertical  
461 vs. horizontal) at each time point (*Cichy et al., 2015; King and Dehaene, 2014*). Trials were  
462 separated into training and testing sets in a 5-fold cross-validation procedure for unbiased  
463 estimates of decoding accuracy. Separate classifiers were trained for each target, yielding a time  
464 series of decoding accuracy for each target and each precue condition. For example, when  
465 decoding T1 orientation, precue T1 trials would be attended and precue T2 trials would be  
466 unattended. To increase signal-to-noise, we averaged small numbers of trials (5 trials) to create  
467 pseudotrials (*Isik et al., 2014; Meyers, 2013; Wardle et al., 2016*) and across small time windows  
468 (5 ms) (*Isik et al., 2014*), and repeated the decoding procedure 100 times with random  
469 pseudotrial groupings to remove any idiosyncrasies due to trial averaging.

470 To reduce noise in the classifier, we performed feature selection in sensor space by  
471 determining the number of channels that contained the most orientation information across all  
472 trials, independent of precue condition. We compared the maximum decoding accuracy,

473 averaged across T1 and T2, from all sessions from the most visually responsive channels, based  
474 on peak prominence (top 10, 20, 50, 100 or all channels; see *Peak analysis*) with 10 repetitions of  
475 the decoding procedure described above. The highest decoding accuracy was obtained using the  
476 top 50 channels. Therefore, for each session, we selected the top 50 visually responsive channels  
477 for sensor space decoding analysis and comparison across precue conditions. Most of the  
478 selected channels were in posterior locations. However, we note that MEG channels capture a  
479 weighted sum of the activities of all brain sources (*Pizzella et al., 2014*).

480 In source space, we decoded the stimulus orientation from the estimated source activation in  
481 atlas-based ROIs. Each ROI contained many vertices, whose activation time series were obtained  
482 from the source reconstruction procedure (see *Source reconstruction*). For each ROI, the number  
483 of features (vertices) can be much larger than the number of samples (trials). To avoid overfitting,  
484 we therefore reduced the feature dimension for ROIs with more than 100 vertices by univariate  
485 feature selection using ANOVA F-test (*Pedregosa et al., 2011; Gramfort et al., 2013*). ANOVA F-test  
486 feature selection was applied on the training set in the 5-fold cross-validation procedure. When  
487 training a classifier for an ROI with more than 100 vertices, we selected 100 features (i.e., estimated  
488 source activation values from 100 vertices) with the highest scores in the ANOVA F-test. Thus, the  
489 input of a classifier for a given ROI was the estimated source activation from no more than 100  
490 vertices. To obtain the decoding performance for each of the occipital, parietal, temporal, and  
491 frontal lobes from the 34 bilateral DK ROIs, we averaged the decoding performance across the  
492 ROIs within each lobe. When investigating the left and right hemispheres separately, we decoded  
493 68 DK ROIs with 34 DK ROIs in each hemisphere. Decoding performance in the critical time window  
494 was calculated by averaging the decoding performance across the time points in the critical time  
495 window.

## 496 **Statistical analysis**

497 The effects of temporal attention on behavior ( $d'$  and RT) were assessed using repeated measures  
498 ANOVAs via the pingouin package in Python. The within-subject factors were target (T1 or T2) and  
499 validity (valid or invalid, with respect to the match between the precue and the response cue),  
500 where two sessions for each subject were averaged.

501 The effects of temporal attention on the MEG time series (evoked response peak magnitude  
502 and latency) were assessed using repeated measures ANOVAs via the pingouin package in Python,  
503 separately for each target and channel grouping. The within-subject factor was precue (precue T1  
504 or precue T2), where two sessions for each subject were averaged.

505 To assess the effect of temporal attention on decoding performance across the full time  
506 series, we used a non-parametric test with cluster correction (*Maris and Oostenveld, 2007*). The  
507 null permutation distribution was obtained by collecting the trials of the two experimental  
508 conditions in a single set, randomly partitioning the trials into two subsets, calculating the test  
509 statistic on this random partition, and repeating the permutation procedure 1000 times to  
510 construct a histogram of the test statistic under the null hypothesis.

511 For each permutation, the test statistic was calculated as follows:

512 (1) For every sample (decoding performance in a 5-ms time window), compare the decoding  
513 accuracy on the two types of trials (precue T1 versus precue T2) by means of a t-value using a  
514 paired t-test.

515 (2) Select all samples whose t-value is larger than some threshold. Higher thresholds are better  
516 suited for identifying stronger, short-duration effects, whereas lower thresholds are better suited  
517 for identifying weaker, long-duration effects (*Maris and Oostenveld, 2007*). We selected a threshold  
518 of  $t=1.5$  ( $n = 10$  subjects), where two sessions for each subject were averaged.

519 (3) Cluster the selected samples in connected sets on the basis of temporal adjacency.

520 (4) Calculate cluster-level statistics by taking the sum of the t-values within a cluster.

521 (5) Take the largest of the cluster-level statistics.

522 The spatial cluster permutation for Figure 5A was calculated in a way similar to the steps  
523 described above using the MNE package in Python with permutation\_cluster\_1samp\_test  
524 function, where the adjacency matrix for the function was determined based on the anatomical  
525 surface location of the DK ROIs, and the number of permutations n\_permutations was set to "all"  
526 to perform an exact test. For each ROI, the averaged decoding accuracy across the time points in  
527 the critical time window for the two types (precue T1 versus precue T2) of trials were compared  
528 using a paired t-test with threshold  $t=2.1$  ( $n = 20$  sessions), alpha level 0.05.

## 529 Acknowledgments

530 We thank Sirui Liu and Luis Ramirez for assistance with early versions of the experiment. We thank  
531 Hsin-Hung Li as well as members of the Denison and Carrasco Labs for helpful comments. We  
532 thank Jeffrey Walker at the NYU MEG lab for technical assistance. This research was supported by  
533 National Institutes of Health National Eye Institute R01 EY019693 to M.C., F32 EY025533 to R.N.D.,  
534 National Defense Science and Engineering Graduate Fellowship to K.J.T., T32 EY007136 to NYU, and  
535 by funding from Boston University to R.N.D.

## 536 References

- 537 **Anderson B**, Sheinberg DL. Effects of temporal context and temporal expectancy on neural activity in inferior  
538 temporal cortex. *Neuropsychologia*. 2008; 46(4):947–957.
- 539 **Anton-Erxleben K**, Carrasco M. Attentional enhancement of spatial resolution: linking behavioural and  
540 neurophysiological evidence. *Nature Reviews Neuroscience*. 2013; 14(3):188–200.
- 541 **Besserve M**, Jerbi K, Laurent F, Baillet S, Martinerie J, Garnero L. Classification methods for ongoing EEG and  
542 MEG signals. *Biological research*. 2007; 40(4):415–437.
- 543 **Bonnefond M**, Jensen O. Alpha oscillations serve to protect working memory maintenance against anticipated  
544 distracters. *Current biology*. 2012; 22(20):1969–1974.
- 545 **Brainard DH**, Vision S. The psychophysics toolbox. *Spatial vision*. 1997; 10(4):433–436.
- 546 **Carrasco M**. Visual attention: The past 25 years. *Vision research*. 2011; 51(13):1484–1525.
- 547 **Cichy RM**, Ramirez FM, Pantazis D. Can visual information encoded in cortical columns be decoded from  
548 magnetoencephalography data in humans? *Neuroimage*. 2015; 121:193–204.
- 549 **Cocuzza CV**, Ito T, Schultz D, Bassett DS, Cole MW. Flexible coordinator and switcher hubs for adaptive task  
550 control. *Journal of Neuroscience*. 2020; 40(36):6949–6968.
- 551 **Correa Á**, Lupiáñez J, Madrid E, Tudela P. Temporal attention enhances early visual processing: A review and  
552 new evidence from event-related potentials. *Brain research*. 2006; 1076(1):116–128.
- 553 **Cotti J**, Rohenkohl G, Stokes M, Nobre AC, Coull JT. Functionally dissociating temporal and motor components  
554 of response preparation in left intraparietal sulcus. *Neuroimage*. 2011; 54(2):1221–1230.
- 555 **Coull JT**, Frith C, Büchel C, Nobre A. Orienting attention in time: behavioural and neuroanatomical distinction  
556 between exogenous and endogenous shifts. *Neuropsychologia*. 2000; 38(6):808–819.
- 557 **Coull JT**, Nobre AC. Where and when to pay attention: the neural systems for directing attention to spatial  
558 locations and to time intervals as revealed by both PET and fMRI. *Journal of Neuroscience*. 1998; 18(18):7426–  
559 7435.
- 560 **Coull J**, Nobre A, Frith C. The noradrenergic  $\alpha 2$  agonist clonidine modulates behavioural and neuroanatomical  
561 correlates of human attentional orienting and alerting. *Cerebral cortex*. 2001; 11(1):73–84.
- 562 **Dale AM**, Liu AK, Fischl BR, Buckner RL, Belliveau JW, Lewine JD, Halgren E. Dynamic statistical parametric  
563 mapping: combining fMRI and MEG for high-resolution imaging of cortical activity. *neuron*. 2000; 26(1):55–  
564 67.
- 565 **Davranche K**, Nazarian B, Vidal F, Coull J. Orienting attention in time activates left intraparietal sulcus for both  
566 perceptual and motor task goals. *Journal of cognitive neuroscience*. 2011; 23(11):3318–3330.

- 567 **Denison RN.** Visual temporal attention from perception to computation. *Nature Reviews Psychology.*  
568 Forthcoming; .
- 569 **Denison RN, Carrasco M, Heeger DJ.** A dynamic normalization model of temporal attention. *Nature human*  
570 *behaviour.* 2021; 5(12):1674–1685.
- 571 **Denison RN, Heeger DJ, Carrasco M.** Attention flexibly trades off across points in time. *Psychonomic bulletin*  
572 *& review.* 2017; 24:1142–1151.
- 573 **Denison RN, Tian K, Heeger DJ, Carrasco M.** Anticipatory and evoked visual cortical dynamics of voluntary  
574 temporal attention. *bioRxiv.* 2022; .
- 575 **Desikan RS, Ségonne F, Fischl B, Quinn BT, Dickerson BC, Blacker D, Buckner RL, Dale AM, Maguire RP, Hyman**  
576 **BT, et al.** An automated labeling system for subdividing the human cerebral cortex on MRI scans into gyral  
577 based regions of interest. *Neuroimage.* 2006; 31(3):968–980.
- 578 **Doherty JR, Rao A, Mesulam MM, Nobre AC.** Synergistic effect of combined temporal and spatial expectations  
579 on visual attention. *Journal of Neuroscience.* 2005; 25(36):8259–8266.
- 580 **Dosenbach NU, Fair DA, Miezin FM, Cohen AL, Wenger KK, Dosenbach RA, Fox MD, Snyder AZ, Vincent JL,**  
581 **Raichle ME, et al.** Distinct brain networks for adaptive and stable task control in humans. *Proceedings of the*  
582 *National Academy of Sciences.* 2007; 104(26):11073–11078.
- 583 **Dux PE, Marois R.** The attentional blink: A review of data and theory. *Attention, Perception, & Psychophysics.*  
584 2009; 71(8):1683–1700.
- 585 **Dworetzky A, Seitzman BA, Adeyemo B, Neta M, Coalson RS, Petersen SE, Gratton C.** Probabilistic mapping  
586 of human functional brain networks identifies regions of high group consensus. *Neuroimage.* 2021;  
587 237:118164.
- 588 **Fernández A, Denison RN, Carrasco M.** Temporal attention improves perception similarly at foveal and  
589 parafoveal locations. *Journal of vision.* 2019; 19(1):12–12.
- 590 **Gramfort A, Luessi M, Larson E, Engemann DA, Strohmeier D, Brodbeck C, Goj R, Jas M, Brooks T, Parkkonen L,**  
591 **Hämäläinen MS.** MEG and EEG Data Analysis with MNE-Python. *Frontiers in Neuroscience.* 2013; 7(267):1–13.  
592 doi: [10.3389/fnins.2013.00267](https://doi.org/10.3389/fnins.2013.00267).
- 593 **Griffin IC, Miniussi C, Nobre AC.** Multiple mechanisms of selective attention: differential modulation of stimulus  
594 processing by attention to space or time. *Neuropsychologia.* 2002; 40(13):2325–2340.
- 595 **Houck JM, Claus ED.** A comparison of automated and manual co-registration for magnetoencephalography.  
596 *PLoS one.* 2020; 15(4):e0232100.
- 597 **Isik L, Meyers EM, Leibo JZ, Poggio T.** The dynamics of invariant object recognition in the human visual system.  
598 *Journal of neurophysiology.* 2014; 111(1):91–102.
- 599 **Kastner S, Ungerleider LG.** Mechanisms of visual attention in the human cortex. *Annual review of neuroscience.*  
600 2000; 23(1):315–341.
- 601 **King JR, Dehaene S.** Characterizing the dynamics of mental representations: the temporal generalization  
602 method. *Trends in cognitive sciences.* 2014; 18(4):203–210.
- 603 **King JR, Pescetelli N, Dehaene S.** Brain mechanisms underlying the brief maintenance of seen and unseen  
604 sensory information. *Neuron.* 2016; 92(5):1122–1134.
- 605 **Klein A, Tourville J.** 101 labeled brain images and a consistent human cortical labeling protocol. *Frontiers in*  
606 *neuroscience.* 2012; 6:171.
- 607 **Kleiner M, Brainard D, Pelli D, Ingling A, Murray R, Broussard C, Cornelissen F.** What is new in psychtoolbox 3.  
608 *Perception.* 2007; 36(14):1–16.
- 609 **Kok P, Mostert P, De Lange FP.** Prior expectations induce prestimulus sensory templates. *Proceedings of the*  
610 *National Academy of Sciences.* 2017; 114(39):10473–10478.
- 611 **Land MF, Furneaux S.** The knowledge base of the oculomotor system. *Philosophical Transactions of the Royal*  
612 *Society of London Series B: Biological Sciences.* 1997; 352(1358):1231–1239.



- 613 **Lawrence DH.** Two studies of visual search for word targets with controlled rates of presentation. *Perception*  
614 & *Psychophysics*. 1971; 10(2):85–89.
- 615 **Lima B, Singer W, Neuenschwander S.** Gamma responses correlate with temporal expectation in monkey  
616 primary visual cortex. *Journal of neuroscience*. 2011; 31(44):15919–15931.
- 617 **Maris E, Oostenveld R.** Nonparametric statistical testing of EEG-and MEG-data. *Journal of neuroscience*  
618 *methods*. 2007; 164(1):177–190.
- 619 **Meyers EM.** The neural decoding toolbox. *Frontiers in neuroinformatics*. 2013; 7:8.
- 620 **Miniussi C, Wilding EL, Coull J, Nobre AC.** Orienting attention in time: Modulation of brain potentials. *Brain*.  
621 1999; 122(8):1507–1518.
- 622 **Molins A, Stufflebeam SM, Brown EN, Hämäläinen MS.** Quantification of the benefit from integrating MEG and  
623 EEG data in minimum  $\ell_2$ -norm estimation. *Neuroimage*. 2008; 42(3):1069–1077.
- 624 **Myers NE, Stokes MG, Nobre AC.** Prioritizing information during working memory: beyond sustained internal  
625 attention. *Trends in cognitive sciences*. 2017; 21(6):449–461.
- 626 **Nobre AC, Van Ede F.** Anticipated moments: temporal structure in attention. *Nature Reviews Neuroscience*.  
627 2018; 19(1):34–48.
- 628 **Nobre AC, Van Ede F.** Attention in flux. *Neuron*. 2023; 111(7):971–986.
- 629 **Nobre ACK, Rohenkohl G.** Time for the fourth dimension in attention. In: *The Oxford handbook of attention*  
630 *Oxford Library of Psychology*; 2014.p. 676–722.
- 631 **Oostenveld R, Fries P, Maris E, Schoffelen JM.** FieldTrip: open source software for advanced analysis of MEG,  
632 EEG, and invasive electrophysiological data. *Computational intelligence and neuroscience*. 2011; 2011:1–9.
- 633 **Pantazis D, Fang M, Qin S, Mohsenzadeh Y, Li Q, Cichy RM.** Decoding the orientation of contrast edges from  
634 MEG evoked and induced responses. *NeuroImage*. 2018; 180:267–279.
- 635 **Pedregosa F, Varoquaux G, Gramfort A, Michel V, Thirion B, Grisel O, Blondel M, Prettenhofer P, Weiss R,  
636 Dubourg V, Vanderplas J, Passos A, Cournapeau D, Brucher M, Perrot M, Duchesnay E.** Scikit-learn: Machine  
637 Learning in Python. *Journal of Machine Learning Research*. 2011; 12:2825–2830.
- 638 **Pelli DG, Vision S.** The VideoToolbox software for visual psychophysics: Transforming numbers into movies.  
639 *Spatial vision*. 1997; 10:437–442.
- 640 **Pizzella V, Marzetti L, Della Penna S, de Pasquale F, Zappasodi F, Romani GL.** Magnetoencephalography in the  
641 study of brain dynamics. *Functional neurology*. 2014; 29(4):241.
- 642 **Raymond JE, Shapiro KL, Arnell KM.** Temporary suppression of visual processing in an RSVP task: An attentional  
643 blink? *Journal of experimental psychology: Human perception and performance*. 1992; 18(3):849.
- 644 **Rohenkohl G, Gould IC, Pessoa J, Nobre AC.** Combining spatial and temporal expectations to improve visual  
645 perception. *Journal of vision*. 2014; 14(4):8–8.
- 646 **Samaha J, Bauer P, Cimaroli S, Postle BR.** Top-down control of the phase of alpha-band oscillations as a  
647 mechanism for temporal prediction. *Proceedings of the National Academy of Sciences*. 2015; 112(27):8439–  
648 8444.
- 649 **Tkacz-Domb S, Yeshurun Y.** Temporal crowding is a unique phenomenon reflecting impaired target encoding  
650 over large temporal intervals. *Psychonomic Bulletin & Review*. 2021; 28(6):1885–1893.
- 651 **Van Ede F, Chekroud SR, Stokes MG, Nobre AC.** Decoding the influence of anticipatory states on visual  
652 perception in the presence of temporal distractors. *Nature communications*. 2018; 9(1):1449.
- 653 **Wallis G, Stokes M, Cousijn H, Woolrich M, Nobre AC.** Frontoparietal and cingulo-opercular networks play  
654 dissociable roles in control of working memory. *Journal of Cognitive Neuroscience*. 2015; 27(10):2019–2034.
- 655 **Wang L, Liu X, Guise KG, Knight RT, Ghajar J, Fan J.** Effective connectivity of the fronto-parietal network during  
656 attentional control. *Journal of cognitive neuroscience*. 2010; 22(3):543–553.

657 **Wang L**, Schoot L, Brothers T, Alexander E, Warnke L, Kim M, Khan S, Hämäläinen M, Kuperberg GR. Predictive  
658 coding across the left fronto-temporal hierarchy during language comprehension. *Cerebral Cortex*. 2023;  
659 33(8):4478–4497.

660 **Wardle SG**, Kriegeskorte N, Grootswagers T, Khaligh-Razavi SM, Carlson TA. Perceptual similarity of visual  
661 patterns predicts dynamic neural activation patterns measured with MEG. *Neuroimage*. 2016; 132:59–70.

662 **Yeshurun Y**, Rashal E, Tkacz-Domb S. Temporal crowding and its interplay with spatial crowding. *Journal of*  
663 *vision*. 2015; 15(3):11–11.

## 664 **Supplementary Text**

### 665 **Replication of enhanced T1 orientation decoding with temporal attention**

666 We confirmed the enhancement of temporal attention on orientation decoding for T1 using an  
667 identical analysis procedure in a separate dataset, in which the targets were superimposed on a  
668 20-Hz flickering noise patch instead of a blank background (see Supplementary Figure 1A).  
669 Although this experiment was not designed for decoding analysis due to the continuous presence  
670 of flickering noise, we again found an enhancement of orientation representation in attended vs.  
671 unattended trials at a similar time window around 250 ms (195-260 ms) after target onset  
672 (Supplementary Figure 1B). Again, there was no effect of temporal attention on T2 decoding  
673 performance. The overlap of the time windows in which temporal attention enhanced orientation  
674 representations in the two experiments (235-260 ms after target onset) indicates that temporal  
675 attention reliably affects the orientation representation in an intermediate processing time  
676 window following the earliest visual evoked responses and peak decoding accuracy.

### 677 **Brief early peak in decoding accuracy for T1**

678 Although only the “critical window” around 250 ms passed the stringent cluster correction test  
679 across the full trial time series, we noted a brief early peak (at 90 ms after target onset,  
680 uncorrected  $p = 0.019$ ) in decoding accuracy for T1 that appeared to be present when T1 was  
681 attended but absent when it was unattended (See Supplementary Figure 2A). Given a previous  
682 finding that temporal attention transiently affects evoked responses to steady-state visual  
683 stimulation (*Denison et al., 2022*), we used source reconstruction to investigate the cortical origin  
684 of this early peak modulation. The effects of temporal attention at 90 ms were strongest in  
685 occipital and parietal areas (Supplementary Figure 2B), a strikingly different topography from the  
686 fronto-cingulate areas modulated during the later critical time window. This result suggests that  
687 any effect of temporal attention on early stimulus representations is localized to visual areas.

## 688 **Supplementary Figures**

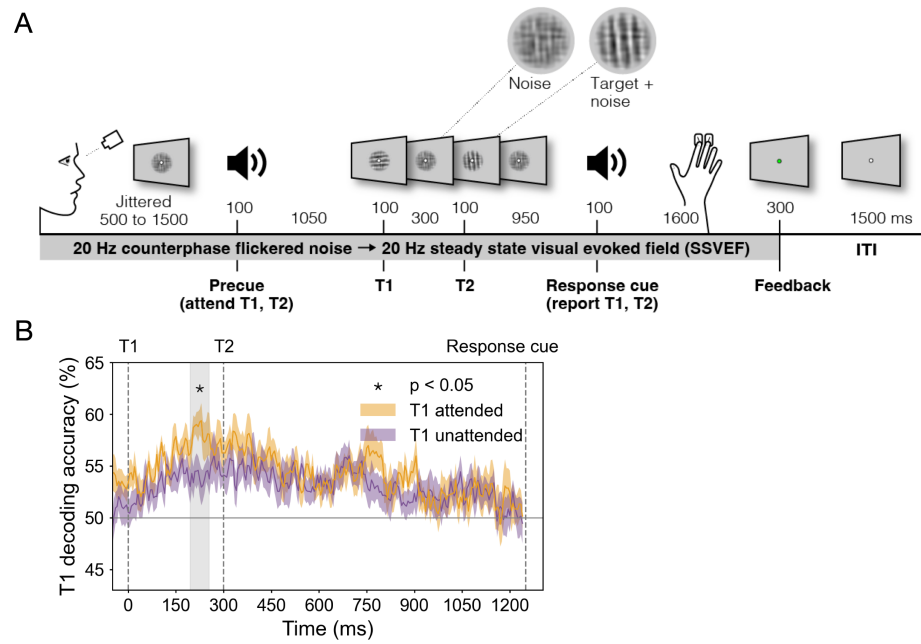

**Supplementary Figure 1.** Decoding performance for a separate experiment with targets superimposed on flickering noise. **(A)** Two-target temporal cueing task. Trial timeline showing stimulus durations and SOAs. Targets were embedded in 20 Hz counterphase flickering noise. Precues and response cues were pure tones (high = cue T1, low = cue T2). **(B)** T1 orientation decoding performance for T1 attended and T1 unattended trials confirms enhancement of T1 representation in an intermediate time window.

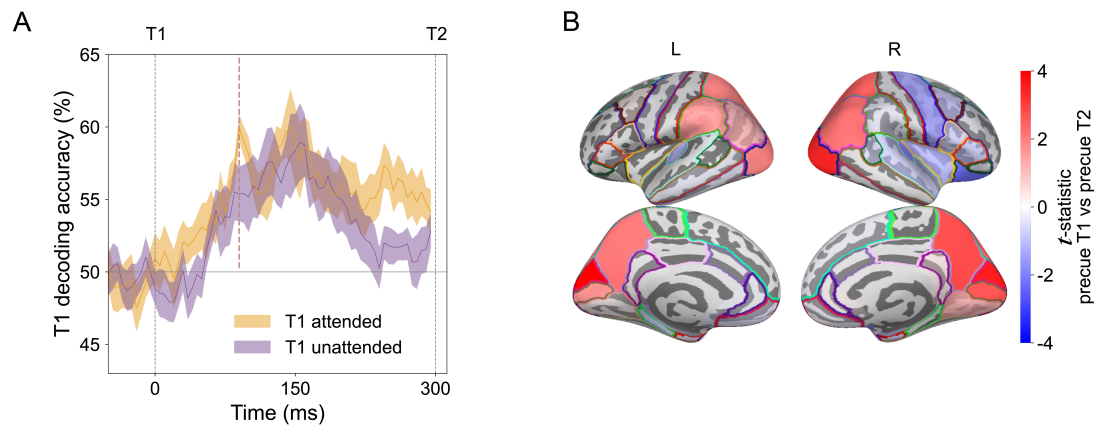

**Supplementary Figure 2.** Topography of attentional enhancement of orientation representations during an early peak. **(A)** T1 decoding time series for attended and unattended trials highlighting early peak (thick dashed line, same data as in Figure 3C). **(B)** T1 decoding differences between attended and unattended conditions for left (L) and right (R) hemispheres at 90 ms after target onset for each of 68 DK ROIs.
